# Supplementary material for: Capicua suppresses YAP1 to limit tumorigenesis and maintain drug sensitivity in human cancer
Source: PubMed Central journal article supplement (PMC9674208; doi:10.1016/j.celrep.2022.111443), 2022-10-04
Supplement: NIHMS1840777-supplement-1.pdf [file NIHMS1840777-supplement-1.pdf]

**Cell Reports, Volume 41**

**Supplemental information**

**Capicua suppresses *YAP1* to limit  
tumorigenesis and maintain drug  
sensitivity in human cancer**

**Ji Won Kim, Cuyler Luck, Wei Wu, Rovingaile Kriska Ponce, Yone Kawe Lin, Nehal  
Gupta, and Ross A. Okimoto**

**Supplementary data:**

**Capicua suppresses YAP1 to limit tumorigenesis and maintain drug sensitivity in human cancer.**

Authors: Ji Won Kim, Cuyler Luck, Wei Wu, Rovingaile Kriska Ponce, Yone Kawe Lin, Nehal Gupta, and Ross A. Okimoto

The supplemental data includes 4 figures with legends, 2 tables, and 1 supplemental table.

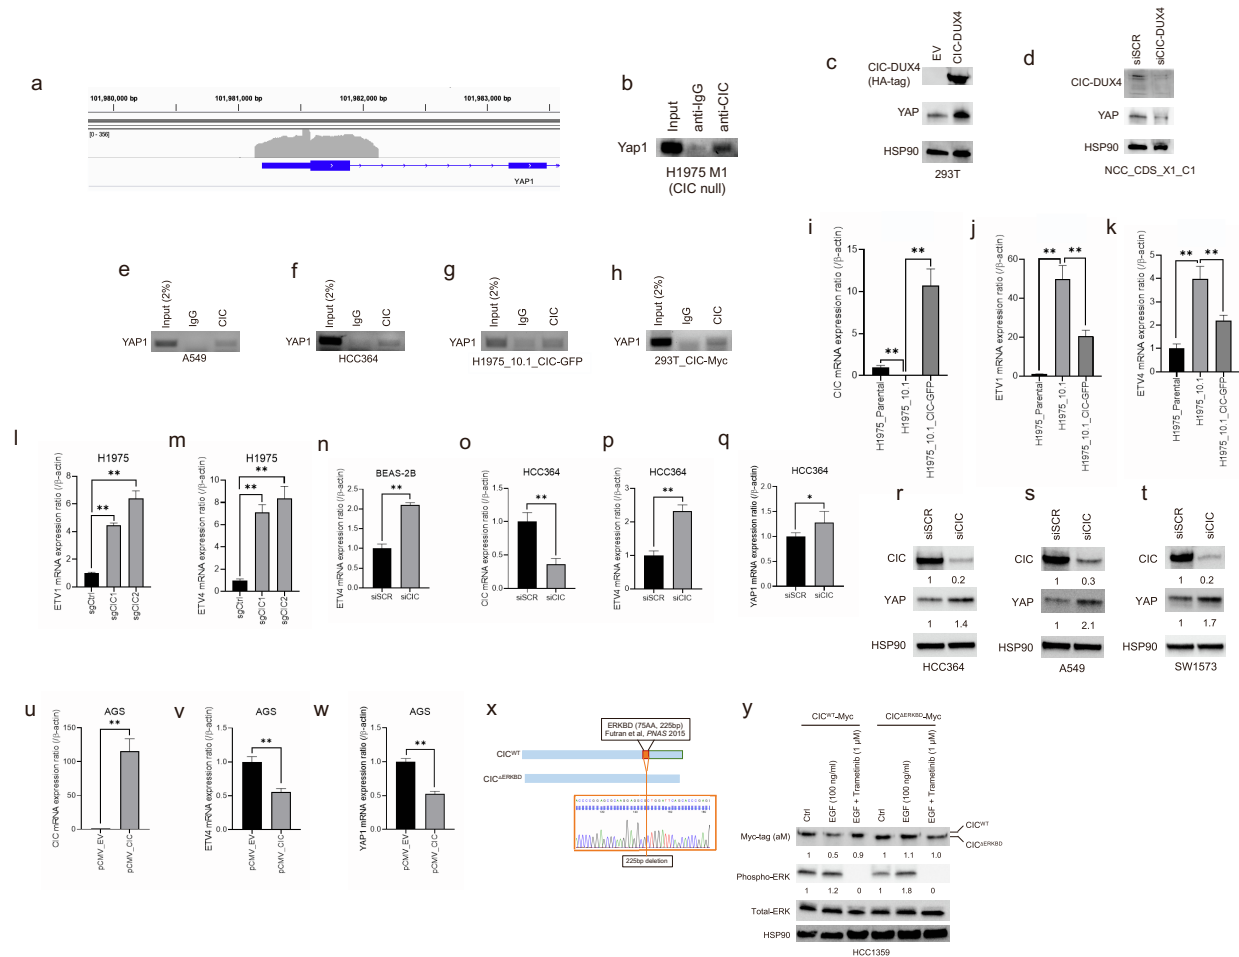

**Supplementary Figure 1. Capicua containing fusion oncoprotein, CIC-DUX4, binds and regulates YAP1 expression, related to Figure 1.**

(a) CIC-DUX4 peak at the proximal YAP1 regulatory element. (b) ChIP-PCR showing CIC-DUX4 occupancy of the YAP1 regulatory element in H1975\_10.1 (CICWT null) cells. (c) Immunoblot of CIC-DUX4 and YAP expression in 293T cells. (d) Immunoblot of CIC-DUX4 and YAP expression in NCC\_CDS\_X1\_C1 (endogenous CIC-DUX4) cells. (e-f) Endogenous CIC ChIP-PCR demonstrating YAP1 occupancy in A549 or HCC364 cells. (g-h) Exogenous CIC ChIP-PCR demonstrating YAP1 occupancy in H1975\_10.1 expressing GFP-tagged CIC (H1975\_10.1\_CIC-GFP) or myc-tagged CIC overexpressing HEK293T cells. (i-k) Relative CIC (i), ETV1 (j), and ETV4 (k) mRNA expression in H1975 parental, H1975\_10.1, and H1975\_10.1\_CIC-GFP. \*\*p<0.01. Error bars represent S.D. (l-m) Relative ETV1 (l) and ETV4 (m) mRNA expression in H1975 cells expressing sgCtrl, sgCIC1, or sgCIC2. \*\*p<0.01. Error bars represent S.D. (n) Relative ETV4 mRNA expression in BEAS-2B cells expressing siScramble (siSCR) control or siCIC. \*\*p<0.01. Error bars represent S.D. (o-q) Relative CIC (o), ETV4 (p), and YAP1 (q) mRNA expression in HCC364 cells expressing siScramble (siSCR) control or siCIC. \*P<0.05, \*\*p<0.01. Error bars represent S.D. (r-t) Immunoblot of CIC and YAP in HCC364 (r), A549 (s), or SW1573 (t) cells expressing either siScramble (siSCR) control or siCIC. (u-w) Relative CIC (u), ETV4 (v), and YAP1 (w) mRNA expression in AGS (loss-of-function CIC mutation) cells expressing EV or

CICWT pCMV expression plasmids. \*\* $p < 0.01$ . Error bars represent S.D. (x) Schematic diagram of the CICWT structure compared to CIC $\Delta$ ERKBD with sanger sequencing of the in frame deletion breakpoint. (y) Immunoblot demonstrating sustained expression of CIC $\Delta$ ERKBD compared to CICWT upon stimulation with recombinant EGF (100 ng/ml) or co-treatment with EGF and trametinib (1  $\mu$ M).

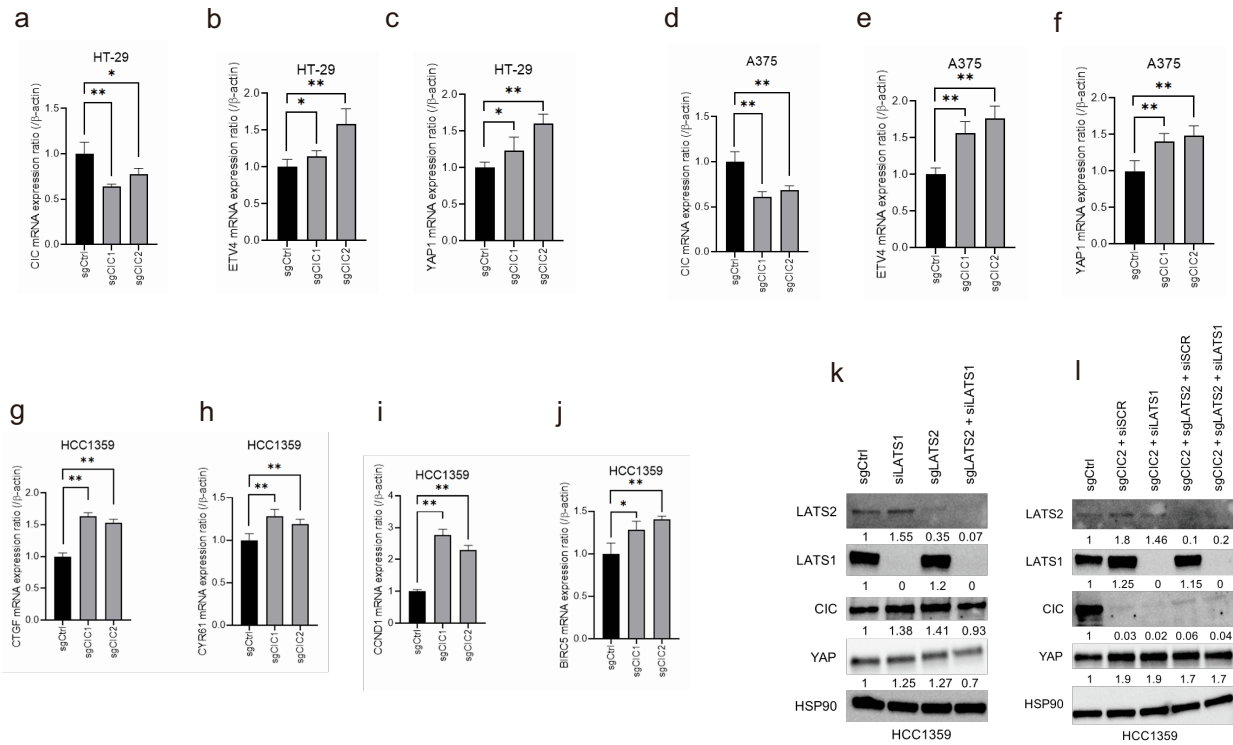

**Supplementary Figure 2. CIC regulates expression of YAP1 and YAP-mediated target gene expression in a Hippo pathway independent manner, related to Figure 1.**

(a-c) Relative CIC (a), ETV4 (b), and YAP1 (c) mRNA expression in HT-29 colorectal adenocarcinoma cells expressing sgCtrl, sgCIC1, or sgCIC2. \* $p < 0.05$ , \*\* $p < 0.01$ . Error bars represent S.D. (d-f) Relative CIC (d), ETV4 (e), and YAP1 (f) mRNA expression in A375 melanoma cells expressing sgCtrl, sgCIC1, or sgCIC2. \*\* $p < 0.01$ . Error bars represent S.D. (g-j) Relative mRNA expression of CTGF (g), CYR61 (h), CCND1 (i), and BIRC5 (j), target genes of YAP, in HCC1359 cells expressing sgCtrl, sgCIC1, or sgCIC2. \* $p < 0.05$ , \*\* $p < 0.01$ . Error bars represent S.D. (k-l) Immunoblots of LATS2, LATS1, CIC, and YAP in HCC1359 cells (k) or HCC1359 cells stably expressing sgCIC2 (l) with either sgLATS2, siLATS1, or both sgLATS2 and siLATS1.

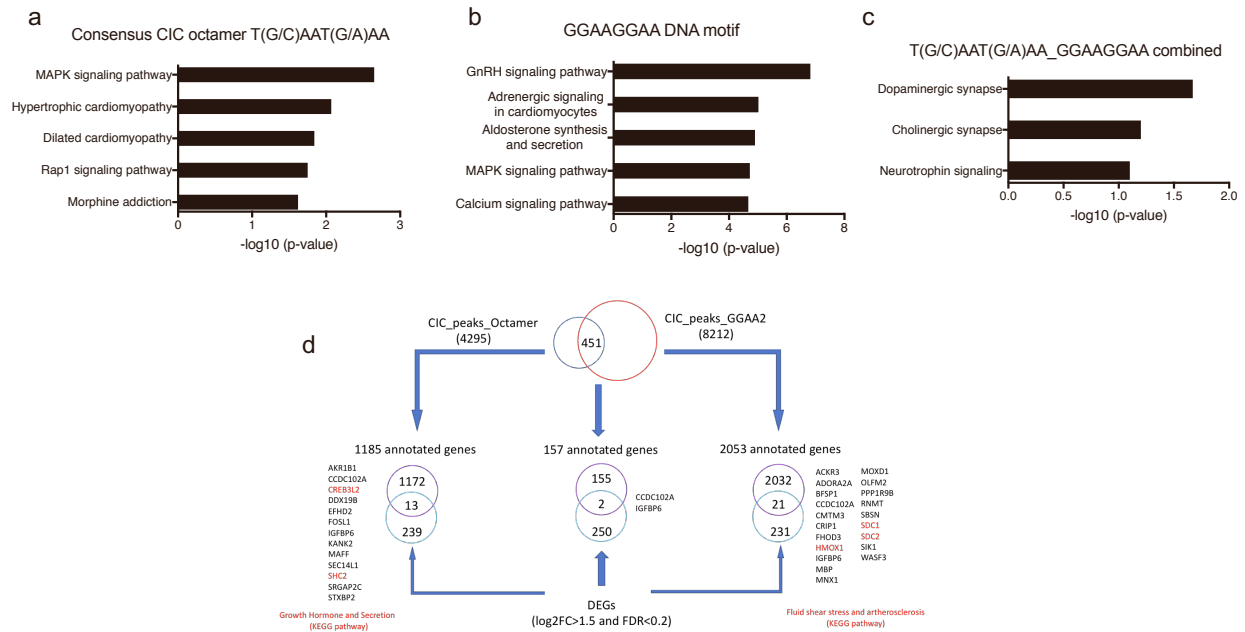

**Supplementary Figure 3. CIC regulates diverse cellular functions through consensus and non-consensus DNA-binding sites, related to Figure 2.**

(a-c) KEGG Pathway analysis using annotated CIC ChIP-Seq genes associated with the consensus T(G/A)AAT(G/A)AA (a), non-consensus (GGAAx2+) (b), or both T(G/A)AAT(G/A)AA and GGAAx2+ (c) motifs. (d) Integration of ChIP-Seq analysis with RNA-Seq data from HCC1359 cells +/- CIC expression.

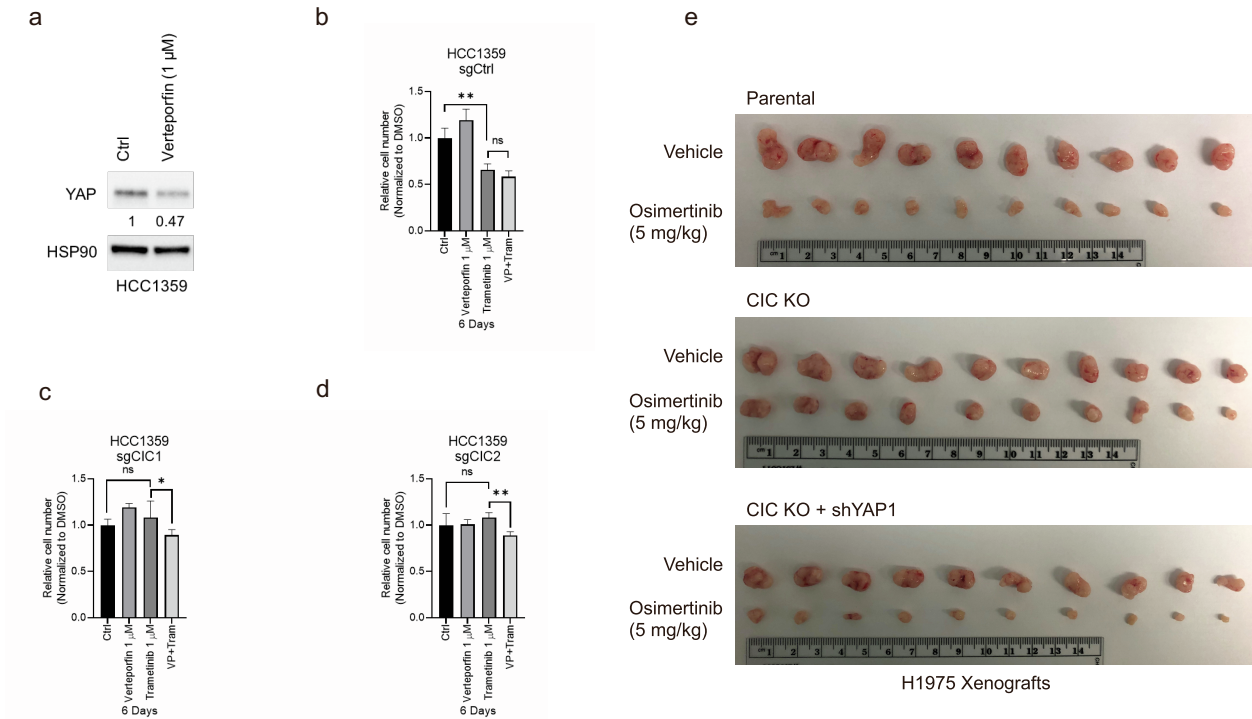

**Supplementary Figure 4. YAP inhibition restores sensitivity to MAPK-targeting agents, related to Figures 3 and 4.**

(a) Immunoblots of YAP and HSP90 in HCC1359 cells treated with DMSO or verteporfin (1  $\mu$ M) for 24 hours. Representative of two independent experiments. (b-d) Relative cell number of HCC1359 cells expressing either sgCtrl (b), sgCIC1 (c), or sgCIC2 (d) and treated for 6 days with verteporfin, trametinib, or combination verteporfin + trametinib. \* $p < 0.05$ , \*\* $p < 0.01$ . Error bars represent S.D. (e) Explanted tumor xenografts from mice harboring H1975 parental, H1975 CIC KO, or H1975 CIC KO + shYAP1 +/- osimertinib treatment.

**Supplementary Table 1. Consensus and Non-Consensus DNA binding motifs mapped to CIC ChIP-Seq peaks, related to Figure 2.**

| DNA binding sequence | # of genomic locations | % of all CIC peaks | # of annotated genes |
|----------------------|------------------------|--------------------|----------------------|
| GGAA                 | 77911                  | 98 %               | 14308                |
| GGAAGGAA             | 8212                   | 10 %               | 2053                 |
| GGAAGGAAGGAA         | 190                    | 0.24 %             | 45                   |
| TGAATGGA             | 1505                   | 1.89 %             | 400                  |
| TCAATGAA             | 645                    | 0.81 %             | 174                  |
| TCAATGGA             | 697                    | 0.87 %             | 209                  |
| TGAATGAA             | 1620                   | 2.0 %              | 402                  |
| T(G/C)AAT(G/A)AA     | 4295 (no duplicates)   | 5.63 %             | 1185                 |

**Supplementary Table 2. List of genes contain both GGAAx2+ and T(G/C)AAT(G/C)AA CIC binding motifs, related to Figure 2.**

| Gene symbol  |           |           |         |         |         |          |
|--------------|-----------|-----------|---------|---------|---------|----------|
| SNORD115-2   | SOGA1     | PDLIM3    | AFF3    | CRTAC1  | SUMO2   | SLX4     |
| SNORD115-9   | IGSF23    | APOBEC3C  | LAIR1   | LGI2    | SOX12   | SORBS2   |
| SNORD115-10  | PTPRVP    | BIN1      | MGMT    | RNLS    | SRD5A1  | GPT2     |
| SNORD115-11  | JAKMIP1   | CECR2     | DDX12P  | BCAS4   | TCF15   | MGARP    |
| SNORD115-17  | DCTD      | ZDHHC22   | SNX29P2 | PRKAR1B | TEAD4   | ZNF577   |
| LIN28B-AS1   | DCTN1     | KLK9      | MUC2    | INAVA   | TLE3    | MIR503HG |
| ZBTB42       | DNMT3B    | SLC25A42  | ZFHX3   | MAPK13  | TNS1    | KIAA1671 |
| LOC100128993 | KRT24     | GRB10     | NEUROD1 | PRMT8   | TP73    | STX10    |
| CDH4         | ERG       | LGALSL    | NPY5R   | KLK10   | CCDC175 | TNFRSF25 |
| LINC00629    | FAT1      | NT5C      | NTSR1   | PSMD1   | NR1H2   | APLN     |
| CDH8         | CYB561A3  | HMGB3     | MIR424  | PTEN    | CACNA1A | CCND3    |
| POP7         | RASGEF1A  | NR4A1     | OCRL    | MIR503  | ARMC7   | PAPSS2   |
| DNAJA2       | SHANK2    | SNORD109B | P4HB    | MICAL3  | CPSF7   | CCDC102A |
| BAIAP2       | MTUS2     | OTOG      | JPT1    | PTPN7   | B9D2    | TGFBRAP1 |
| ADARB2       | SLC7A8    | ECEL1P2   | TMEM216 | PTPRE   | EEPDI   | OPN4     |
| CEBPE        | LILRA4    | IGFBP6    | PCSK2   | PVR     | DUSP16  | NAPSA    |
| BVES         | ALPP      | TNFRSF9   | SCARA3  | SH2D4A  | CAMK2A  | NCOR2    |
| NACC1        | NAPSB     | IPW       | RAB6B   | TMEM91  | CAMK2G  | PIEZO1   |
| LMTK3        | C2orf72   | CERKL     | NECAB2  | LIPK    | ABHD17A | ARHGEF11 |
| CCR7         | NGEF      | KCNJ6     | GNB1L   | ANHXL   | DYSF    |          |
| ANKS3        | C20orf194 | CCDC9B    | FBLIM1  | CERK    | TRAPPC9 |          |
| C1orf216     | CYTH4     | SBK1      | PAQR5   | SLC4A1  | TKTL2   |          |
| CRABP2       | BRPF3     | LIN28B    | NSUN2   | SLC7A1  | SOAT2   |          |



**Supplementary Table 3. List of oligonucleotides, related to STAR Methods**

| Gene name                             | Species | Primer sequences                     |
|---------------------------------------|---------|--------------------------------------|
| YAP1 ChIP-PCR                         | Human   | 5'-GGACTCGGAGACCGACCTGGAG-3'         |
|                                       |         | 5'-GCTCCGGCGGCTTGAAGAAGG-3'          |
| CIC <sup>ΔERKBD</sup> mutant          | Human   | 5'-CTGGATTCAGCACCCGAGGACC-3'         |
|                                       |         | 5'-CGCCTCCTTGCCTCCGG-3'              |
| pGL4.10-YAP1 (-1533/+86)              | Human   | 5'-GATCGGTACCAATCATGGGTGTC-3'        |
|                                       |         | 5'-GATCCTCGAGAGCTCGTTGCCTTTC-3'      |
| pGL4.10-YAP1 (-461/+86)               | Human   | 5'-TATCAAGATCTGGCCTCG-3'             |
|                                       |         | 5'-GCCGAAAGAAGTGGAGAG-3'             |
| pGL4.10-YAP1 (-305/+86)               | Human   | 5'-TATCAAGATCTGGCCTCG-3'             |
|                                       |         | 5'-CAAACGATGGGTCCAATC-3'             |
| pGL4.10-YAP1 (-4/+86)                 | Human   | 5'-TATCAAGATCTGGCCTCG-3'             |
|                                       |         | 5'-CCCGACTGAGACAGAAAC-3'             |
| pGL4.10-YAP1 (-256/-5)                | Human   | 5'-CGCAGCCGCCGCCAGGGAAAAG-3'         |
|                                       |         | 5'-CAGCCGGGCAGGGGCCCG-3'             |
| CIC siRNA                             | Human   | Cat# L-015185-01-0005 (GE Dharmacon) |
| LATS1 siRNA                           | Human   | Cat# L-004632-00-0005 (GE Dharmacon) |
| CIC Taqman gene expression assays     | Human   | Hs00943425_g1                        |
| YAP1 Taqman gene expression assays    | Human   | Hs00902708_g1                        |
| ETV1 Taqman gene expression assays    | Human   | Hs00951951_m1                        |
| ETV4 Taqman gene expression assays    | Human   | Hs00383361_g1                        |
| CTGF Taqman gene expression assays    | Human   | Hs00170014_m1                        |
| CYR61 Taqman gene expression assays   | Human   | Hs00155479_m1                        |
| CCND1 Taqman gene expression assays   | Human   | Hs00765553_m1                        |
| BIRC5 Taqman gene expression assays   | Human   | Hs04194392_s1                        |
| β-actin Taqman gene expression assays | Human   | Hs01060665_g1                        |
